# Supplementary material for: Predicting In-Hospital Mortality in Severe COVID-19: A Systematic Review and External Validation of Clinical Prediction Rules
Source: MDPI journal article supplement (doi:10.3390/biomedicines10102414), 2022-09-27
Supplement: s1 [file s1]

**Supplementary Table S2.** Overview of prediction models for mortality risk from Covid-19 identified in a systematic review of the literature, and performance of each model in derivation cohorts. Formulas to calculate mortality risk to be applied to any population were provided or extracted from original documents.

| Author,<br>Year <sup>reference</sup>                                                                                                                                                                                                                                                    | Country           | Study<br>period<br>(2020) | N                        | Methods used<br>to derivate<br>nomograms                                                                                                                                                                                                                                                                                           | Predictors in final model                                                                                                                                                                                           | AUROC (95%<br>confidence<br>interval) | Cut-off<br>value                    | Sensitivity<br>(%) | Specificity<br>(%) | Positive<br>predictive<br>value (%) | Negative<br>predictive<br>value (%) |
|-----------------------------------------------------------------------------------------------------------------------------------------------------------------------------------------------------------------------------------------------------------------------------------------|-------------------|---------------------------|--------------------------|------------------------------------------------------------------------------------------------------------------------------------------------------------------------------------------------------------------------------------------------------------------------------------------------------------------------------------|---------------------------------------------------------------------------------------------------------------------------------------------------------------------------------------------------------------------|---------------------------------------|-------------------------------------|--------------------|--------------------|-------------------------------------|-------------------------------------|
| Abdulaal A et<br>al. 2020 <sup>18</sup>                                                                                                                                                                                                                                                 | United<br>Kingdom | 1 Mar –<br>24 Apr         | 398<br>(D: 318<br>V: 80) | Cox regression<br>model                                                                                                                                                                                                                                                                                                            | Age; Sex; Obesity; ischaemic heart disease;<br>cardiac failure; chronic liver disease;<br>chronic kidney disease; cerebrovascular<br>event; cough; dyspnoea; abdominal pain;<br>confusion; collapse.                | 0.869<br>(0.857 – 0.882)              | 50%                                 | 50                 | 96.6               | 84.6                                | 83.6                                |
|                                                                                                                                                                                                                                                                                         |                   |                           |                          | ANN                                                                                                                                                                                                                                                                                                                                | Same variables + hypertension; diabetes,<br>NOD; chronic respiratory disease; fever;<br>diarrhoea or vomiting; myalgia and<br>olfactory change.                                                                     | 0.926<br>(0.911 – 0.941)              |                                     | 64.7               | 96.8               | 84.6                                | 91.4                                |
|                                                                                                                                                                                                                                                                                         |                   |                           |                          | h(t) = h0(t) × exp(0.05 × age- + (−0.78 × sex) + 1.48 × obesity + (0.93 × ischaemic heart disease) + 0.91 × cardiac failure + (1.36 × chronic liver disease) + (1.03 × chronic kidney disease) + (0.78 × cerebrovascular event) + 1.01 × cough + 1.54 × dyspnoea + (−1.45 × abdominal pain) + 1.81 × confusion + (1.35 × collapse) |                                                                                                                                                                                                                     |                                       |                                     |                    |                    |                                     |                                     |
| Acar HC et al.<br>2021 <sup>56</sup>                                                                                                                                                                                                                                                    | Turkey            | 16<br>March –<br>18 June  | 709                      | Multivariate<br>logistic<br>regression                                                                                                                                                                                                                                                                                             | Age; Comorbidity; Dyspnoea; SpO <sub>2</sub> ;<br>haematocrit; CRP; AST and ferritin                                                                                                                                | 0.922<br>(0.89 - 0.96)                | <17 points<br>(Low Risk<br>(<10%))  | NA                 | NA                 | NA                                  | NA                                  |
|                                                                                                                                                                                                                                                                                         |                   |                           |                          |                                                                                                                                                                                                                                                                                                                                    |                                                                                                                                                                                                                     |                                       | >38 points<br>(High Risk<br>(>90%)) |                    |                    |                                     |                                     |
| Total Score: Age [55-64 (4) / 65-74 (8) / >75 (12)] + Comorbidity (3) + Dyspnoea (2) + SpO2 (%) [89-94 (3) / <88 (9)] + Haematocrit (%) [<35% (3)] + CRP (mg/L) [>50 - <100 (2) / ≥ 100 (6)] + AST (IU/L) [>40 - <80 (2) / ≥ 80 (7)] + Ferritin (ng/mL) [>400 - <1000 (2) / ≥ 1000 (5)] |                   |                           |                          |                                                                                                                                                                                                                                                                                                                                    |                                                                                                                                                                                                                     |                                       |                                     |                    |                    |                                     |                                     |
| An C et al.<br>2020 <sup>19</sup>                                                                                                                                                                                                                                                       | Korea             | 23 Jan -<br>2 April       | 10237                    | LASSO                                                                                                                                                                                                                                                                                                                              | age >80; acarbose; age >70; metformin;<br>cancer; age >60; nursing home infection;<br>metropolitan; mental illness; cluster                                                                                         | 0.963<br>(0.946 - 0.979)              | ND                                  | 90.7               | 91.4               | 24.6                                | 99.7                                |
|                                                                                                                                                                                                                                                                                         |                   |                           |                          | Linear SVM                                                                                                                                                                                                                                                                                                                         | infection; urban; lung disease or asthma,<br>fenofibrate; male; disability >moderate;                                                                                                                               | 0.962<br>(0.945 - 0.979)              |                                     | 92.0               | 91.8               | 25.7                                | 99.7                                |
|                                                                                                                                                                                                                                                                                         |                   |                           |                          | RBF-SVM                                                                                                                                                                                                                                                                                                                            | symptomatic; ACE inhibitor; beta blocker;                                                                                                                                                                           | 0.958<br>(0.945 - 0.971)              |                                     | 42.7               | 97.8               | 37.6                                | 98.2                                |
|                                                                                                                                                                                                                                                                                         |                   |                           |                          | RF                                                                                                                                                                                                                                                                                                                                 | age >40; seniors living alone; loop<br>diuretics; cerebrovascular disease; income<br>(50-75%); DDP-4 inhibitor; cardiovascular<br>disease; sulfonylurea; chronic renal<br>disease; hypertension; Income (medicaid); | 0.958<br>(0.936 - 0.981)              |                                     | 32.0               | 98.8               | 44.4                                | 97.9                                |
|                                                                                                                                                                                                                                                                                         |                   |                           |                          | KNN                                                                                                                                                                                                                                                                                                                                | age <40; aspirin; DM; personal contact;<br>statin; income (25-50%); chronic liver<br>disease; calcium channel blocker; income<br>(>75%); disability mild; NSAID;<br>hyperlipidaemia and AR blocker.                 | 0.897<br>(0.856 -0.937)               |                                     | 81.3               | 89.5               | 19.3                                | 99.4                                |
| Bellan M et al.<br>2021 <sup>57</sup>                                                                                                                                                                                                                                                   | Italy             | 1 Mar –<br>28 April       | 664<br>V:bootstrap       | Multivariate<br>regression                                                                                                                                                                                                                                                                                                         | Age (<74); Male gender; Platelets (<166000);<br>NLR (>4.68) and RDW (>13.7%)                                                                                                                                        | No global<br>(individually<br>stated) | ND                                  | NA                 | NA                 | NA                                  | NA                                  |



| Author,<br>Year <sup>reference</sup>  | Country               | Study<br>period<br>(2020) | N     | Methods<br>used to<br>derivate<br>nomograms | Predictors in final model                                                                                                                                                                                                                                                                                                                                                                                                                                                                                                                                                                                                                                                                                                                                                                                                                                                                                                                                                                                                                                                                 | AUROC (95%<br>confidence<br>interval)                                                    | Cut-off<br>value | Sensitivity<br>(%) | Specificity<br>(%) | Positive<br>predictiv<br>e value<br>(%) | Negative<br>predictive<br>value (%) |
|---------------------------------------|-----------------------|---------------------------|-------|---------------------------------------------|-------------------------------------------------------------------------------------------------------------------------------------------------------------------------------------------------------------------------------------------------------------------------------------------------------------------------------------------------------------------------------------------------------------------------------------------------------------------------------------------------------------------------------------------------------------------------------------------------------------------------------------------------------------------------------------------------------------------------------------------------------------------------------------------------------------------------------------------------------------------------------------------------------------------------------------------------------------------------------------------------------------------------------------------------------------------------------------------|------------------------------------------------------------------------------------------|------------------|--------------------|--------------------|-----------------------------------------|-------------------------------------|
| Clift AK et<br>al. 2020 <sup>23</sup> | United<br>Kingdo<br>m | 24 Jan -<br>30 Apr        | 10776 | LASSO                                       | Ethnic group; nursing home or homeless;<br>disability; chronic kidney disease;<br>chemotherapy; blood cancer; bone marrow<br>or stem cell transplant in past 6 months;<br>respiratory tract cancer; radiotherapy in<br>past 6 months; solid organ transplant<br>(excluding kidney and bone marrow);<br>immunosuppressant medication from GP<br>4+ scripts in past 6 months; leukotriene or<br>long acting $\beta$ agonist 4+ scripts in past 6<br>months; oral steroids 4+ scripts in past 6<br>months; sickle cell disease or severe<br>immunodeficiency; diabetes; COPD;<br>asthma; rare lung conditions; pulmonary<br>hypertension or pulmonary fibrosis;<br>coronary heart disease; stroke; atrial<br>fibrillation; congestive cardiac failure;<br>thromboembolism; peripheral vascular<br>disease; congenital heart disease; dementia;<br>Parkinson's disease; epilepsy; motor<br>neurone disease, multiple sclerosis,<br>myasthenia gravis, or Huntington's;<br>cerebral palsy; severe mental illness;<br>osteoporotic fracture; rheumatoid arthritis<br>or SLE; cirrhosis of liver | C- Statistic<br><br>Men: 0.928 (0.919<br>- 0.938)<br><br>Women: 0.933<br>(0.923 - 0.944) | NA               | NA                 | NA                 | NA                                      | NA                                  |
| Ding Z et<br>al. 2021 <sup>54</sup>   | China                 | 18 Jan-<br>25 Apr         | 2073  | Cox<br>regression                           | Age; severe pneumonia; lymphocyte count;<br>platelets; CRP; D-dimer; creatinine; cTnl;<br>AST and D-bilirubine.                                                                                                                                                                                                                                                                                                                                                                                                                                                                                                                                                                                                                                                                                                                                                                                                                                                                                                                                                                           | 0.887<br>(0.844 - 0.929)<br>C- Statistic                                                 | NA               | NA                 | NA                 | NA                                      | NA                                  |

| Author,<br>Year <sup>reference</sup>                                                                                                                                                                                                                                                                                 | Country | Study<br>period<br>(2020) | N                                                                                         | Methods<br>used to<br>derivate<br>nomograms | Predictors in final model                                                                                      | AUROC (95%<br>confidence<br>interval)                                       | Cut-off value                                                                                                                                                                | Sensitivity<br>(%) | Specificity<br>(%) | Positive<br>predictive<br>value (%) | Negative<br>predictive<br>value (%) |
|----------------------------------------------------------------------------------------------------------------------------------------------------------------------------------------------------------------------------------------------------------------------------------------------------------------------|---------|---------------------------|-------------------------------------------------------------------------------------------|---------------------------------------------|----------------------------------------------------------------------------------------------------------------|-----------------------------------------------------------------------------|------------------------------------------------------------------------------------------------------------------------------------------------------------------------------|--------------------|--------------------|-------------------------------------|-------------------------------------|
| Dong YM et al<br>2021 <sup>61</sup>                                                                                                                                                                                                                                                                                  | China   | Jan -<br>Mar              | <b>628</b><br>D: 390<br>V:238                                                             | Cox<br>regression<br>and LASSO              | Hypertension; NLR; NT-<br>proBNP                                                                               | D: 0.922 (14day)<br>/ 0.919 (21day)<br>V: 0.922 (14day)<br>/ 0.881 (21 day) | NA                                                                                                                                                                           | NA                 | NA                 | NA                                  | NA                                  |
| Ebell MH et al<br>2021 <sup>62</sup>                                                                                                                                                                                                                                                                                 | USA     | 1 Mar –<br>12 Jun         | <b>1442</b><br>NoLab: 1342<br>(60% D /<br>40%V)<br>SimpleLab:<br>741<br>(60% D /<br>40%V) | Multivariate<br>logistic<br>regression      | NoLab: Age; Respiratory<br>Rate and O <sub>2</sub> saturation                                                  | D: 0.771<br>V: 0.803                                                        | Low (0 – 1<br>points)                                                                                                                                                        | 2.5                | 76.1               | 1.8                                 | 81.5                                |
|                                                                                                                                                                                                                                                                                                                      |         |                           |                                                                                           |                                             |                                                                                                                |                                                                             | Moderate (2 – 5)                                                                                                                                                             |                    |                    |                                     |                                     |
|                                                                                                                                                                                                                                                                                                                      |         |                           |                                                                                           |                                             |                                                                                                                |                                                                             | High (≥ 6<br>points)                                                                                                                                                         | 36.4               | 92.4               | 45.8                                | 89.2                                |
|                                                                                                                                                                                                                                                                                                                      |         |                           |                                                                                           |                                             | SimpleLab: Age;<br>Respiratory Rate and O <sub>2</sub><br>saturation; CRP; Asthma;<br>WBC and serum creatinine | D: 0.835<br>V: 0.833                                                        | Low (0 – 7<br>points)                                                                                                                                                        | -                  | -                  | -                                   | -                                   |
|                                                                                                                                                                                                                                                                                                                      |         |                           |                                                                                           |                                             |                                                                                                                |                                                                             | Moderate (8 –<br>11)                                                                                                                                                         |                    |                    |                                     |                                     |
|                                                                                                                                                                                                                                                                                                                      |         |                           |                                                                                           |                                             |                                                                                                                |                                                                             | High (≥ 12<br>points)                                                                                                                                                        | 85.3               | 66.3               | 31.4                                | 96.2                                |
| Total NoLab Score: Age [50 to 65 years (3 points) > 65 years (5 points)] + Respiratory Rate [≥ 30 breaths/min (3 points)] + O <sub>2</sub> saturation [>93% (2 points)]                                                                                                                                              |         |                           |                                                                                           |                                             |                                                                                                                |                                                                             |                                                                                                                                                                              |                    |                    |                                     |                                     |
| Total SimpleLab Score: [50 to 65 years (6 points) > 65 years (8 points)] + Respiratory Rate [≥ 30 breaths/min (5 points)] + O <sub>2</sub> saturation [>93% (4 points)] + CRP [>10 mg/dL (5 points)] + Asthma [Yes (4 points)] + WBC [>10 x 10 <sup>9</sup> /mL (3 points)] + serum creatinine [>2 mg/dL (4 points)] |         |                           |                                                                                           |                                             |                                                                                                                |                                                                             |                                                                                                                                                                              |                    |                    |                                     |                                     |
| Foieni F et al.<br>2020 <sup>17</sup>                                                                                                                                                                                                                                                                                | Italy   | 15 Mar<br>- 30 Apr        | <b>119</b><br>(D: 79<br>V: 40)                                                            | Multiple<br>linear<br>regression            | Age; fever +5 days;<br>hypertension; Patter US<br>“Wet”; P/F ratio; Lactates;<br>WBC and CRP                   | 0,90<br>(0,801 - 0,982)                                                     | Group 1:<br>0.3087–0.9391;<br>Group 2:<br>0.9392–1.5696;<br>Group 3:<br>1.5697–2.2000;<br>Group 4:<br>2.2001–2.8304                                                          | NA                 | NA                 | NA                                  | NA                                  |
|                                                                                                                                                                                                                                                                                                                      |         |                           |                                                                                           |                                             |                                                                                                                |                                                                             | Total Score: -0,998 + (Age*0,014) + (Fever*0,213) + (Hypertension*0,194) + (US*0,731) + (P/F*0,002) + (Lactate*0,041) + (WBC*-0,022) + (CPR*0,019)<br>https://health-key.it/ |                    |                    |                                     |                                     |
| Gao Y et al.<br>2020 <sup>24</sup>                                                                                                                                                                                                                                                                                   | China   | 27 Jan –<br>21 Mar        | <b>2160</b>                                                                               | MRPMC                                       |                                                                                                                | 0.9621<br>(0.946 – 0.978)                                                   |                                                                                                                                                                              | 57.3               | 98.3               | 85                                  | 93.2                                |
|                                                                                                                                                                                                                                                                                                                      |         |                           |                                                                                           | SVM                                         | Respiratory rate; BUN; D-<br>dimer; age; platelets; SpO <sub>2</sub> ;<br>lymphocytes; albumin; sex;           | 0.9594<br>(0.942 – 0.976)                                                   |                                                                                                                                                                              | 60.7               | 97.8               | 81.8                                | 93.7                                |
|                                                                                                                                                                                                                                                                                                                      |         |                           |                                                                                           | GBDT                                        | fever; number                                                                                                  | 0.9454<br>(0.925 – 0.966)                                                   | 60% (0.6)                                                                                                                                                                    | 60.7               | 96.6               | 75                                  | 93.6                                |
|                                                                                                                                                                                                                                                                                                                      |         |                           |                                                                                           | Logistic<br>Regression                      | comorbidities; sputum;<br>chronic kidney disease and<br>consciousness                                          | 0.9614<br>(0.946 – 0.977)                                                   |                                                                                                                                                                              | 56.2               | 98.1               | 83.3                                | 93.1                                |
|                                                                                                                                                                                                                                                                                                                      |         |                           |                                                                                           | KNN                                         |                                                                                                                | 0.9615<br>(0.946 – 0.977)                                                   |                                                                                                                                                                              | 51.7               | 98.9               | 88.5                                | 92.5                                |

| Author, Year <sup>reference</sup>    | Country | Study period (2020)                     | N                          | Methods used to derivate nomograms                                                                                                                                          | Predictors in final model                                                              | AUROC (95% confidence interval)                                                                                                                                                                                                                                                                                                                                                                                                                                                                                                                                                                                                                                                                                                                                                                                                                                                                                                                  | Cut-off value                                              | Sensitivity (%) | Specificity (%) | Positive predictive value (%) | Negative predictive value (%) |
|--------------------------------------|---------|-----------------------------------------|----------------------------|-----------------------------------------------------------------------------------------------------------------------------------------------------------------------------|----------------------------------------------------------------------------------------|--------------------------------------------------------------------------------------------------------------------------------------------------------------------------------------------------------------------------------------------------------------------------------------------------------------------------------------------------------------------------------------------------------------------------------------------------------------------------------------------------------------------------------------------------------------------------------------------------------------------------------------------------------------------------------------------------------------------------------------------------------------------------------------------------------------------------------------------------------------------------------------------------------------------------------------------------|------------------------------------------------------------|-----------------|-----------------|-------------------------------|-------------------------------|
| Guan X et al. 2021 <sup>63</sup>     | China   | 27 Jan - 5 Apr                          | 1270<br>D: 984<br>V:286    | Cox regression, LASSO and XGBoost                                                                                                                                           | Disease severity; Age; hsCRP; LDH; ferritin and LDH                                    | D: 0.921<br>V: 0.891                                                                                                                                                                                                                                                                                                                                                                                                                                                                                                                                                                                                                                                                                                                                                                                                                                                                                                                             | NA                                                         | NA              | NA              | NA                            | NA                            |
| Harmouch F et al. 2020 <sup>64</sup> | USA     | 1 Mar – 15 Apr                          | 560                        | Multivariate logistic regression                                                                                                                                            | Age and Troponin (≥0.05ng/ml)                                                          | 0.793<br>(0.733 – 0.853)                                                                                                                                                                                                                                                                                                                                                                                                                                                                                                                                                                                                                                                                                                                                                                                                                                                                                                                         | NA                                                         | NA              | NA              | NA                            | NA                            |
| He J et al. 2021 <sup>65</sup>       | China   | 4 Feb – 31 Mar                          | 3611<br>D: 2119<br>V: 1412 | Multivariate logistic regression                                                                                                                                            | Nomo1: Age; Dyspnea; Anorexia; WBC; NLR; PLT; AST; Albumin and CRP                     | D: 0.920<br>(0.882 – 0.957)<br>V: 0.92<br>(0.86 – 0.98)                                                                                                                                                                                                                                                                                                                                                                                                                                                                                                                                                                                                                                                                                                                                                                                                                                                                                          | NA                                                         | 86.7            | 88.7            | NA                            | NA                            |
|                                      |         |                                         |                            |                                                                                                                                                                             | Nomo2: Age; Dyspnea; NLR and CRP                                                       | D: 0.896<br>(0.855 – 0.936)<br>V: 0.89<br>(0.83 – 0.96)                                                                                                                                                                                                                                                                                                                                                                                                                                                                                                                                                                                                                                                                                                                                                                                                                                                                                          |                                                            | 76.7            | 89.8            | NA                            | NA                            |
|                                      |         |                                         |                            |                                                                                                                                                                             |                                                                                        |                                                                                                                                                                                                                                                                                                                                                                                                                                                                                                                                                                                                                                                                                                                                                                                                                                                                                                                                                  |                                                            |                 |                 |                               |                               |
|                                      |         |                                         |                            |                                                                                                                                                                             |                                                                                        |                                                                                                                                                                                                                                                                                                                                                                                                                                                                                                                                                                                                                                                                                                                                                                                                                                                                                                                                                  |                                                            |                 |                 |                               |                               |
| Hu C et al. 2020 <sup>48</sup>       | China   | 28 Jan - 11 Mar                         | 284<br>(D: 184<br>V: 64)   | Random Forest                                                                                                                                                               |                                                                                        | 0.922                                                                                                                                                                                                                                                                                                                                                                                                                                                                                                                                                                                                                                                                                                                                                                                                                                                                                                                                            |                                                            | 91.4            | 76              | NA                            | NA                            |
|                                      |         |                                         |                            | Bagged FDA                                                                                                                                                                  |                                                                                        | 0.899                                                                                                                                                                                                                                                                                                                                                                                                                                                                                                                                                                                                                                                                                                                                                                                                                                                                                                                                            |                                                            | 88.1            | 73              | NA                            | NA                            |
|                                      |         |                                         |                            | Logistic Regression                                                                                                                                                         | Age; lymphocytes; D-dimer and CRP                                                      | 0.895                                                                                                                                                                                                                                                                                                                                                                                                                                                                                                                                                                                                                                                                                                                                                                                                                                                                                                                                            | 50%                                                        | 89.2            | 68.7            | NA                            | NA                            |
|                                      |         |                                         |                            | PLS                                                                                                                                                                         |                                                                                        | 0.885                                                                                                                                                                                                                                                                                                                                                                                                                                                                                                                                                                                                                                                                                                                                                                                                                                                                                                                                            |                                                            | 91.2            | 66.3            | NA                            | NA                            |
|                                      |         |                                         |                            | Elastic net                                                                                                                                                                 |                                                                                        | 0.884                                                                                                                                                                                                                                                                                                                                                                                                                                                                                                                                                                                                                                                                                                                                                                                                                                                                                                                                            |                                                            | 91.2            | 64.7            | NA                            | NA                            |
|                                      |         |                                         |                            | Total Score: -4,211 + 0,013xCRP + 0,059xAge + 0,112xDD - 1,984xLym<br><a href="https://phenomics.fudan.edu.cn/risk_scores/">https://phenomics.fudan.edu.cn/risk_scores/</a> |                                                                                        |                                                                                                                                                                                                                                                                                                                                                                                                                                                                                                                                                                                                                                                                                                                                                                                                                                                                                                                                                  |                                                            |                 |                 |                               |                               |
| Ji D et al. 2020 <sup>12</sup>       | China   | 20 Jan - 22 Feb                         | 208                        | Cox regression                                                                                                                                                              | Comorbidity; age; lymphocyte and LDH                                                   | 0.91<br>(0.86 – 0.94)                                                                                                                                                                                                                                                                                                                                                                                                                                                                                                                                                                                                                                                                                                                                                                                                                                                                                                                            | 6 points<br>9 points                                       | 95<br>45        | 78<br>97        | 50.7<br>78.3                  | 98.5<br>11.9                  |
|                                      |         |                                         |                            |                                                                                                                                                                             |                                                                                        | Total Score: (Comorbidity x4) + (Age> 60 x3) + (Lymphocytes ≤ 1 x 10 <sup>9</sup> x3) + (LDH >500 x3 ó LDH 250 - 500 x2)                                                                                                                                                                                                                                                                                                                                                                                                                                                                                                                                                                                                                                                                                                                                                                                                                         |                                                            |                 |                 |                               |                               |
| Jian M et al. 2021 <sup>66</sup>     | China   | D: 1 Jan – 10 Apr<br>V: 13 Jan – 25 Mar | 1905<br>D: 1717<br>V: 188  | Cox regression                                                                                                                                                              | Age; Gender; COPD; AST; hsCRP; hsTNI; WBC; Lymphocyte count; D-dimer and Procalcitonin | D: C-Statistic 0.888<br>(0.869 – 0.907)<br>V: C-Statistic 0.838<br>(0.777– 0.899)                                                                                                                                                                                                                                                                                                                                                                                                                                                                                                                                                                                                                                                                                                                                                                                                                                                                | Low Risk (<2%)<br>Moderate Risk (2 -9%)<br>High Risk (>9%) | NA              | NA              | NA                            | NA                            |
|                                      |         |                                         |                            |                                                                                                                                                                             |                                                                                        | Total Score: Age [10y (0 points) / 20y (11 points) / 30y (22 points) / 40y (33 points) / 50y (44 points) / 60y (56 points) / 70y (67 points) / 80y (78 points) / 90y (89 points) / 100y (100 points)] + Gender [Female (0 points) Male (20 points)] + COPD [No (0 points Yes (23 points)] + AST [≤ 40 U/L (0 points) >40 U/L (22 points)] + hsCRP [≤ 10 mg/L (0) >10 mg/L (50 POINTS)] + hsTNI [≤15.6 (0 points) >15.6 (52 points)] + WBC [4-10 10 <sup>9</sup> /L (0 points) <4 10 <sup>9</sup> /L (7 points) ≥ 10 10 <sup>9</sup> /L (40 points)] + Lymphocyte count [≥ 1 10 <sup>9</sup> /L (0 points) ≥0.8 to <1 10 <sup>9</sup> /L (1 point) ≥ 0.5 to <0.8 10 <sup>9</sup> /L (12 points) <0.5 10 <sup>9</sup> /L (43 points)] + D-dimer [≤ 0.5 µg/L (0 points) ≥0.5 to <1 µg/L (7 points) ≥ 1 µg/L (37 points)] + Procalcitonin [<0.05 ng/mL(0 points) ≥0.05 to <0.5 ng/mL (37 points) ≥0.5 to <2 ng/mL (54 points) ≥ 2 ng/mL (69 points)] |                                                            |                 |                 |                               |                               |
|                                      |         |                                         |                            |                                                                                                                                                                             |                                                                                        |                                                                                                                                                                                                                                                                                                                                                                                                                                                                                                                                                                                                                                                                                                                                                                                                                                                                                                                                                  |                                                            |                 |                 |                               |                               |

| Author, Year <sup>reference</sup>   | Country        | Study period (2020)                    | N                                 | Methods used to derivate nomograms | Predictors in final model                                                                                                                         | AUROC (95% confidence interval)                                                                                                                                                                                                                                                                                                                                                                                                                        | Cut-off value | Sensitivity (%) | Specificity (%) | Positive predictive value (%) | Negative predictive value (%) |
|-------------------------------------|----------------|----------------------------------------|-----------------------------------|------------------------------------|---------------------------------------------------------------------------------------------------------------------------------------------------|--------------------------------------------------------------------------------------------------------------------------------------------------------------------------------------------------------------------------------------------------------------------------------------------------------------------------------------------------------------------------------------------------------------------------------------------------------|---------------|-----------------|-----------------|-------------------------------|-------------------------------|
| Kamran SM et al. 2020 <sup>25</sup> | Pakistan       | 10 Apr-31 Aug                          | 252                               | Cox regression                     | Respiratory rate; resting oxygen saturation and alveolar-arterial oxygen gradient                                                                 | 0.850 (0.80 - 0.89)                                                                                                                                                                                                                                                                                                                                                                                                                                    | 9 points      | 80              | 84              | 55                            | 95                            |
|                                     |                |                                        |                                   |                                    |                                                                                                                                                   |                                                                                                                                                                                                                                                                                                                                                                                                                                                        |               |                 |                 |                               |                               |
| Kim DH et al. 2021 <sup>68</sup>    | Korea          | Up to 30 Apr                           | 5621                              | Cox regression                     | Sex; BMI; CCIS; Dyspnea; Hemoglobin; Lymphocyte and Platelet                                                                                      | C- Statistic 0.933                                                                                                                                                                                                                                                                                                                                                                                                                                     | NA            | NA              | NA              | NA                            | NA                            |
| Ke Z et al. 2022 <sup>67</sup>      | China          | Jan - Mar                              | 96<br>D: 66<br>V: 30              | Cox regression and LASSO           | Age; Temperature; Oxygen saturation; initial oxygen mode; Lymphocyte count and Radscore                                                           | C- Statistic D: 0.912 (0.867– 0.907) V: 0.907 (0.849– 0.966)                                                                                                                                                                                                                                                                                                                                                                                           | NA            | NA              | NA              | NA                            | NA                            |
| Knight SR et al. 2020 <sup>15</sup> | United Kingdom | 6 Feb - 20 May                         | 57824 (D: 35463 V: 22361)         | Machine learning                   | Age; sex; number comorbidities; respiratory rate; peripheral oxygen saturation; Glasgow scale; urea level and CPR                                 | 0.786 (0.781 – 0.790)                                                                                                                                                                                                                                                                                                                                                                                                                                  | > 9 points    | 92.5            | 38.6            | 39.3                          | 92.3                          |
|                                     |                |                                        |                                   |                                    |                                                                                                                                                   | > 15 points                                                                                                                                                                                                                                                                                                                                                                                                                                            | 38            | 89.8            | 61.5            | 77.1                          |                               |
|                                     |                |                                        |                                   |                                    |                                                                                                                                                   | Total Score: Age (<50; 50 - 59; +2; 60 - 69; +4; 70- 79; +6; >=80; +7) + Sex (Female; Male +1) + N° comorbidities (0; 1; +1; >=2; +2) + Respiratory Rate (breaths/min) (<20; 20 - 29; +1 ; >=30; +2) + peripheral oxygen saturation (>=92; <92; +2) + Glasglow scale (15; <15; +2) + Urea level (mmol/L) (<7; 7- 14; +1; >14; +3) + RCP (mg/L) (<50; 50 - 99; +1; >=100; +2) <a href="https://isaric4c.net/risk/v2/">https://isaric4c.net/risk/v2/</a> |               |                 |                 |                               |                               |
| Li J et al. 2021 <sup>69</sup>      | China          | 8 Jan – 17 Mar                         | 326                               | Multivariate logistic regression   | Age; CVD; WBC; Platelet; AST; Cystatin C, CRP; CKMB and D-dimer                                                                                   | C- Statistic 0.903                                                                                                                                                                                                                                                                                                                                                                                                                                     | NA            | NA              | NA              | NA                            | NA                            |
| Li L et al. 2021 <sup>70</sup>      | China          | D: 13 Feb – 5 Mar<br>V: 5 Mar – 10 Apr | 4086 (D: 1780 IV: 1242 EV: 1064)* | Cox regression                     | Age; Severity at admission; Dyspnoea; Cardiovascular disease; Total bilirubin; Blood glucose; Urea and LDH                                        | C- Statistic D: 0.97 (0.95 – 0.98) IV: 0.96 (0.94 – 0.98) EV: 0.92 (0.86 – 0.98)                                                                                                                                                                                                                                                                                                                                                                       | NA            | NA              | NA              | NA                            | NA                            |
| Liang W et al. 2020 <sup>26</sup>   | China          | 21 Nov -31 Jan                         | 1590                              | Logistic regression and LASSO      | Chest radiographic abnormality; age; haemoptysis; dyspnoea; unconsciousness, number comorbidities; cancer history; NLR; LDH and direct bilirubin. | 0.88 (0.85 - 0.91)                                                                                                                                                                                                                                                                                                                                                                                                                                     | NA            | NA              | NA              | NA                            | NA                            |
|                                     |                |                                        |                                   |                                    |                                                                                                                                                   |                                                                                                                                                                                                                                                                                                                                                                                                                                                        |               |                 |                 |                               |                               |

| Author,<br>Year <sup>reference</sup>                                                    | Country | Study<br>period<br>(2020) | N                        | Methods used to<br>derivate<br>nomograms | Predictors in final model                                                                                                                                                                                                                                                                                                                                                                                                                                                                                                                                                                                                      | AUROC (95%<br>confidence<br>interval)      | Cut-off<br>value | Sensitivity<br>(%) | Specificity<br>(%) | Positive<br>predictive<br>value (%) | Negative<br>predictive<br>value (%) |
|-----------------------------------------------------------------------------------------|---------|---------------------------|--------------------------|------------------------------------------|--------------------------------------------------------------------------------------------------------------------------------------------------------------------------------------------------------------------------------------------------------------------------------------------------------------------------------------------------------------------------------------------------------------------------------------------------------------------------------------------------------------------------------------------------------------------------------------------------------------------------------|--------------------------------------------|------------------|--------------------|--------------------|-------------------------------------|-------------------------------------|
| Liu J et al.<br>2020 <sup>27</sup>                                                      | China   | 30 Jan -<br>20 Feb        | 214                      | Cox regression                           | Age; lymphocytes; LDH and procalcitonin                                                                                                                                                                                                                                                                                                                                                                                                                                                                                                                                                                                        | 0.78<br>(0.73 - 0.83)                      | NA               | NA                 | NA                 | NA                                  | NA                                  |
| Liu Q et al.<br>2021 <sup>51</sup>                                                      | China   | 10 Jan –<br>27 Feb        | 416<br>(D: 337<br>V: 79) | Logistic<br>regression and<br>LASSO      | Age; gender and BUN; creatinine ratio                                                                                                                                                                                                                                                                                                                                                                                                                                                                                                                                                                                          | 0.838<br>(0.795 – 0.880)<br>(C- Statistic) | 59.8<br>points   | 74.5               | 81                 | NA                                  | NA                                  |
| Lorente L et<br>al. 2020 <sup>28</sup>                                                  | Spain   | -                         | 143                      | -                                        | RDW                                                                                                                                                                                                                                                                                                                                                                                                                                                                                                                                                                                                                            | 0.71<br>(0.63 – 0.78)                      | 13%              | 88                 | 45                 | 25                                  | 95                                  |
| Ma X et al.<br>2020 <sup>29</sup>                                                       | China   | 22 Jan -<br>20 Feb        | 523                      | Random forest                            | Pulse oxygen saturation <90%; age;<br>creatinine; creatine kinase; D-dimer;<br>neutrophil percentage; LDH; Leucocyte<br>count; albumin; time form illness onset to<br>hospital admission; glutamic-oxalacetic<br>transaminase; neutrophil count; lymphocyte<br>percentage; respiratory rate >24 breaths per<br>min; prothrombin time; BUN; platelet; direct<br>bilirubin; CRP; incubation period; eosinophil<br>percentage; temperature; chronic respiratory<br>disease; COPD; chest tightness; diabetes;<br>coronary heart disease; chest CT;<br>cardiovascular disease; hypertension;<br>dyspnoea; cluster and Expectoration | 0.9852<br>(0.961 – 1)                      | 0.441            | 85                 | 98.7               | NA                                  | NA                                  |
| Ma X et al.<br>2020 <sup>30</sup>                                                       | China   | 15 Jan -<br>15 Mar        | 292                      | Multivariate<br>logistic<br>regression   | LDH; CRP and Age                                                                                                                                                                                                                                                                                                                                                                                                                                                                                                                                                                                                               | 0.952                                      | NA               | NA                 | NA                 | NA                                  | NA                                  |
| Total Score: $-10.5772 + 0.0076 \text{ LDH} + 0.00175 \text{ CRP} + 0.0857 \text{ Age}$ |         |                           |                          |                                          |                                                                                                                                                                                                                                                                                                                                                                                                                                                                                                                                                                                                                                |                                            |                  |                    |                    |                                     |                                     |
| Ma X et al.<br>2020 <sup>31</sup>                                                       | China   | 12 Jan -<br>20 Mar        | 262                      | Logistic<br>regression                   | Age; chronic heart disease; lymphocytes;<br>platelets; CRP; LDH and D-Dimer                                                                                                                                                                                                                                                                                                                                                                                                                                                                                                                                                    | 0.948<br>(0.923 – 0.973)                   | NA               | NA                 | NA                 | NA                                  | NA                                  |

| Author,<br>Year <sup>reference</sup>         | Country                                                                                                                                                                                                                                                                                              | Study<br>period<br>(2020) | N                                  | Methods used<br>to derivate<br>nomograms                        | Predictors in final model                                                                                                                                                                   | AUROC (95%<br>confidence<br>interval)            | Cut-off<br>value | Sensitivity<br>(%) | Specificity<br>(%) | Positive<br>predictive<br>value (%) | Negative<br>predictive<br>value (%) |
|----------------------------------------------|------------------------------------------------------------------------------------------------------------------------------------------------------------------------------------------------------------------------------------------------------------------------------------------------------|---------------------------|------------------------------------|-----------------------------------------------------------------|---------------------------------------------------------------------------------------------------------------------------------------------------------------------------------------------|--------------------------------------------------|------------------|--------------------|--------------------|-------------------------------------|-------------------------------------|
| Magro B et<br>al. 2021 <sup>52</sup>         | Italy                                                                                                                                                                                                                                                                                                | 22 Feb -<br>7 Apr         | <b>2191</b><br>(D: 1810<br>V: 381) | Cox regression                                                  | Age; gender; LDH; ischemic heart disease; liver<br>disease; diabetes and days elapsed from first<br>symptoms before hospitalization                                                         | 0.822<br>(0.722 – 0.922)                         | NA               | NA                 | NA                 | NA                                  | NA                                  |
|                                              | <a href="https://sites.google.com/community.unipa.it/covid-19riskpredictions/c19-rp">https://sites.google.com/community.unipa.it/covid-19riskpredictions/c19-rp</a>                                                                                                                                  |                           |                                    |                                                                 |                                                                                                                                                                                             |                                                  |                  |                    |                    |                                     |                                     |
| Moon HJ<br>et al. 2021 <sup>71</sup>         | South<br>Korea                                                                                                                                                                                                                                                                                       | 1 Feb –<br>30 Apr         | <b>5626</b>                        | Cox<br>regression and<br>Multivariate<br>logistic<br>regression | Age; Gender; Fever; Dyspnoea; DM; Cancer and<br>Dementia                                                                                                                                    | Overall<br>mortality<br>0.959<br>(0.945 – 0.933) | NA               | NA                 | NA                 | NA                                  | NA                                  |
|                                              | Multivariate logistic regression total score: -7.05 + 2.81*Age (years) + 1.08*Male gender + 0.27*Fever + 2.14*Dyspnoea + 1.17*DM + 1.38*Cancer +2.12*Dementia<br>Cox regression total score: 2.58*Age (years) + 0.84*Male gender + 0.67*Fever + 1.58*Dyspnoea + 0.69*DM + 0.82*Cancer +1.49*Dementia |                           |                                    |                                                                 |                                                                                                                                                                                             |                                                  |                  |                    |                    |                                     |                                     |
| Niu Y et al.<br>2021 <sup>53</sup>           | China                                                                                                                                                                                                                                                                                                | 23 Jan -<br>5 Mar         | <b>662</b><br>(D: 150<br>V: 512)   | Multivariate<br>logistic<br>regression                          | Diabetes; LDH and SOFA Score                                                                                                                                                                | 0.970<br>(0.947 – 0.992)                         | -                | 90.3               | 90.8               | NA                                  | NA                                  |
|                                              | Total Score: -5.594 +(1.124 x SOFA) + (2.578 x LDH ([LDH≤245] = 0, [LDH>245] = 1) + (2.349 x Diabetes (without diabetes = 0, with diabetes = 1))                                                                                                                                                     |                           |                                    |                                                                 |                                                                                                                                                                                             |                                                  |                  |                    |                    |                                     |                                     |
| Ottenhoff<br>MC et al.<br>2021 <sup>72</sup> | Dutch                                                                                                                                                                                                                                                                                                | 27 Feb –<br>8 Jun         | <b>2273</b>                        | Multivariate<br>logistic<br>regression                          | Age; Number of medication; Chronic cardiac<br>disease (not hypertension); Blood ph; Blood<br>albumin; Urea nitrogen; LDH; Oxygen saturation<br>and oxygen saturation measure on room air or | 0.81<br>(0.77 – 0.85)                            | NA               | 77                 | 71                 | 41                                  | 93                                  |
|                                              |                                                                                                                                                                                                                                                                                                      |                           |                                    | XGBoost                                                         | oxygen therapy                                                                                                                                                                              | 0.82<br>(0.79 – 0.85)                            | NA               | 67                 | 75                 | 44                                  | 91                                  |
| Pan D et al.<br>2020 <sup>32</sup>           | China                                                                                                                                                                                                                                                                                                | 9 Feb –<br>10 Mar         | <b>204</b><br>(D: 120<br>V: 84)    | Multivariate<br>logistic<br>regression                          | CRP; PaO <sub>2</sub> /FIO <sub>2</sub> and troponin I                                                                                                                                      | 0.988<br>(0.972 – 1.000)                         | NA               | NA                 | NA                 | NA                                  | NA                                  |
| Pan P et al.<br>2020 <sup>33</sup>           | China                                                                                                                                                                                                                                                                                                | 2 Feb –<br>15 Apr         | <b>123</b><br>(D: 98<br>V: 25)     | Log regression                                                  | LDH; prothrombin time; creatinine; lymphocytes;<br>neutrophils; eosinophils; total bilirubin and<br>albumin                                                                                 | 0.84<br>(0.656 - 1)                              | 0.3962           | 73.3               | 80                 | 84.6                                | 66.7                                |
|                                              |                                                                                                                                                                                                                                                                                                      |                           |                                    | AdaBoost                                                        |                                                                                                                                                                                             | 0.911<br>(0.802 – 1)                             | 0.4283           | 66.7               | 90                 | 90.9                                | 64.3                                |
|                                              |                                                                                                                                                                                                                                                                                                      |                           |                                    | GBDT                                                            |                                                                                                                                                                                             | 0.85<br>(0.699 – 1)                              | 0.4583           | 73.3               | 80                 | 84.6                                | 66.7                                |
|                                              |                                                                                                                                                                                                                                                                                                      |                           |                                    | XGBoost<br>model                                                |                                                                                                                                                                                             | 0.92<br>(0.814 – 1)                              | 0.4478           | 80%                | 90                 | 92.3                                | 75                                  |
|                                              |                                                                                                                                                                                                                                                                                                      |                           |                                    | CatBoost                                                        |                                                                                                                                                                                             | 0.9133<br>(0.799 – 1)                            | 0.5063           | 86.7               | 80                 | 86.7                                | 80                                  |
| Park JG et<br>al. 2020 <sup>34</sup>         | Korea                                                                                                                                                                                                                                                                                                | 19 Jan -<br>2 Mar         | <b>289</b>                         | Cox regression                                                  | Age; AST; ALT and platelets                                                                                                                                                                 | 0.702<br>(0.627 – 0.778)                         | ≥4.95            | 48.5               | 87.6               | 55%                                 | 84.4                                |
|                                              |                                                                                                                                                                                                                                                                                                      |                           |                                    |                                                                 |                                                                                                                                                                                             | Total Score: age × AST/ (platelet count × √ALT)  |                  |                    |                    |                                     |                                     |



| Author, Year <sup>reference</sup>                                                                                                                                                                                                                                                                                                      | Country       | Study period (2020)                      | N                       | Methods used to derivate nomograms                             | Predictors in final model                                                                                                       | AUROC (95% confidence interval) | Cut-off value                                                                              | Sensitivity (%) | Specificity (%) | Positive predictive value (%) | Negative predictive value (%) |
|----------------------------------------------------------------------------------------------------------------------------------------------------------------------------------------------------------------------------------------------------------------------------------------------------------------------------------------|---------------|------------------------------------------|-------------------------|----------------------------------------------------------------|---------------------------------------------------------------------------------------------------------------------------------|---------------------------------|--------------------------------------------------------------------------------------------|-----------------|-----------------|-------------------------------|-------------------------------|
| Pfeifer N et al. 2022 <sup>73</sup>                                                                                                                                                                                                                                                                                                    | Germany       | 1 Mar – 31 Mar                           | 164                     | Multivariate logistic regression                               | Age; Cognitive deterioration; O2 saturation; Lymphocytopenia; renal function deterioration; CRP; Monocyte count and Comorbidity | 0.937                           | NA                                                                                         | NA              | NA              | NA                            | NA                            |
| Rahman T et al. 2021 <sup>74</sup>                                                                                                                                                                                                                                                                                                     | China         | 10 Jan - 18 Feb                          | 375<br>D: 70%<br>V: 30% | Multivariate logistic regression                               | Age; Neutrophils count; Platelet count; Monocytes; WBC; Lymphocyte count and RDW                                                | 0.961                           | <10.8 (Low Risk (<5%)<br>10.8 – 10.96 (Moderate Risk (5 -50%)<br>> 10.96 (High Risk (>50%) | 87              | 90              | NA                            | NA                            |
| Total Score: -12.75911 + [0.5784669 x Neutrophils count (10 <sup>3</sup> /μL)] + (0.0724752 x Age) – [0.009611 x Platelet count (10 <sup>3</sup> /μL)] + [0.0931182 x Monocytes (%)] + [0.0064276 x WBC (10 <sup>3</sup> /μL)] – [3.567051 x Lymphocyte count (10 <sup>3</sup> /μL)] + [0.7140086 x RDW (%)]                           |               |                                          |                         |                                                                |                                                                                                                                 |                                 |                                                                                            |                 |                 |                               |                               |
| Rahman T et al. 2021 <sup>75</sup>                                                                                                                                                                                                                                                                                                     | USA and China | D: 24 Mar – 30 Apr<br>V: 10 Jan – 18 Feb | 759<br>D: 384<br>V: 375 | Multivariate logistic regression                               | Age; Lymphocyte count; D-dimer; CRP and creatinine                                                                              | D: 0.940<br>V: 0.987            | <16.6 (Low Risk (<5%)<br>16.7 – 19.8 (Moderate Risk (5 -50%)<br>> 19.8 (High Risk (>50%)   | 91              | 78              | NA                            | NA                            |
| Total Score: -0.7606855 + (1.904726 * Age) – (1.964625* Lymphocyte count) – (1.508334 * D-dimer) + (0.709297 * CRP) + (0.2467726 * Creatinine)                                                                                                                                                                                         |               |                                          |                         |                                                                |                                                                                                                                 |                                 |                                                                                            |                 |                 |                               |                               |
| Salto-Alejandre S et al. 2020 <sup>35</sup>                                                                                                                                                                                                                                                                                            | Spain         | 21 Feb – 8 Apr                           | 244                     | Multivariate logistic regression                               | Peripheral capillary oxygen saturation; neutrophils; platelets; LDH and CRP                                                     | 0.891<br>(0.847 – 0.936)        | 50%                                                                                        | 62.5            | 90.1            | 68.6                          | 87.4                          |
| Total Score: = –4.655 + 3.075 (SpO2 <95%) + 1.324 (neutrophil count >7.5 × 10 <sup>9</sup> per L) + 1.492 (platelet count <130 × 10 <sup>9</sup> per L) + 0.981 (LDH ≥300 UI/L) + 0.916 (CRP ≥100 mg/L)                                                                                                                                |               |                                          |                         |                                                                |                                                                                                                                 |                                 |                                                                                            |                 |                 |                               |                               |
| Sánchez-Montañes M et al. 2020 <sup>76</sup>                                                                                                                                                                                                                                                                                           | Spain         | 5 Feb – 23 Apr                           | 1696                    | Logistic Regression<br>Decision Tree<br>RF<br>Tree Naive Bayes | Age; Gender; O2 Saturation; Residential Institution and Oncological Patient Deterioration                                       | 0.89<br>0.81<br>0.90<br>0.87    | 80<br>NA                                                                                   | 73<br>77<br>79  | 83<br>83<br>79  | 46<br>45<br>44<br>41          | 96<br>94<br>97<br>95          |
| Santos-Lozano A et al. 2020 <sup>36</sup>                                                                                                                                                                                                                                                                                              | Spain         | 28 Feb – 30 Mar                          | 1369                    | artificial neural network                                      | Age; glomerular filtration rate; haemoglobin; albumin and LDH                                                                   | 0.91<br>(0.71–0.96)             | NA                                                                                         | 61              | 95              | NA                            | NA                            |
| Soto-Mota A et al. 2020 <sup>16</sup>                                                                                                                                                                                                                                                                                                  | Mexico        | 30 Apr- 20 May                           | 400                     | Multivariate logistic regression                               | Lymphocytes; Sat O2; white blood cells; hypertension; age; renal injury and myocardial injury                                   | 0,96<br>(0,94 - 0,98)           | >65                                                                                        | 63              | 97.5            | 96                            | 72.5                          |
| Total Score: (X /(1+X) *100): Age (<40 (0,002) / 40 - 49 (0,004) / 50 - 59 (0,013) / 60 - 69 (0,037) / 70 - 79 (0,087) / >=80 (0,174) * HTA (x 2,06) * SO2<88% (x 6,85) * Mio Injury (x 6) * WBC >10000 (x 4,23) *Lymphocytes <800 (x 2,89) * Renal Injury (x 4,23)<br><a href="https://lowharmcalc.com/">https://lowharmcalc.com/</a> |               |                                          |                         |                                                                |                                                                                                                                 |                                 |                                                                                            |                 |                 |                               |                               |

| Author,<br>Year <sup>reference</sup>            | Country | Study<br>period<br>(2020) | N                                   | Methods used<br>to derivate<br>nomograms                                                                                                                                                                                                                                                                                                                                                                                                                                                                                                                                                                                                                                                                 | Predictors in final model                                                                                                               | AUROC (95%<br>confidence<br>interval) | Cut-off<br>value  | Sensitivity<br>(%) | Specificity<br>(%) | Positive<br>predictive<br>value (%) | Negative<br>predictive<br>value (%) |
|-------------------------------------------------|---------|---------------------------|-------------------------------------|----------------------------------------------------------------------------------------------------------------------------------------------------------------------------------------------------------------------------------------------------------------------------------------------------------------------------------------------------------------------------------------------------------------------------------------------------------------------------------------------------------------------------------------------------------------------------------------------------------------------------------------------------------------------------------------------------------|-----------------------------------------------------------------------------------------------------------------------------------------|---------------------------------------|-------------------|--------------------|--------------------|-------------------------------------|-------------------------------------|
| Torres-<br>Macho J et<br>al. 2020 <sup>50</sup> | Spain   | 2 Mar -<br>31 May         | <b>1968</b><br>(D: 1181<br>V: 393)  | WoE Method                                                                                                                                                                                                                                                                                                                                                                                                                                                                                                                                                                                                                                                                                               |                                                                                                                                         | 0.865                                 |                   |                    |                    |                                     |                                     |
|                                                 |         |                           |                                     | Gradient Boosting                                                                                                                                                                                                                                                                                                                                                                                                                                                                                                                                                                                                                                                                                        |                                                                                                                                         | 0.975                                 |                   |                    |                    |                                     |                                     |
|                                                 |         |                           |                                     | Random Forest                                                                                                                                                                                                                                                                                                                                                                                                                                                                                                                                                                                                                                                                                            | Age; O <sub>2</sub> saturation; creatinine;                                                                                             | 1                                     | NA                | NA                 | NA                 | NA                                  |                                     |
|                                                 |         |                           |                                     | SVM Linear Kernel                                                                                                                                                                                                                                                                                                                                                                                                                                                                                                                                                                                                                                                                                        | lymphocytes; haemoglobin; smoking;                                                                                                      | 0.869                                 |                   |                    |                    |                                     |                                     |
|                                                 |         |                           |                                     | Neural Network                                                                                                                                                                                                                                                                                                                                                                                                                                                                                                                                                                                                                                                                                           | CRP; platelets and sodium                                                                                                               | 0.929                                 |                   |                    |                    |                                     |                                     |
|                                                 |         |                           |                                     | SVM Quadratic Kernel                                                                                                                                                                                                                                                                                                                                                                                                                                                                                                                                                                                                                                                                                     |                                                                                                                                         | 0.921                                 |                   |                    |                    |                                     |                                     |
|                                                 |         |                           |                                     | Total Score: Age [<46 (-46 ) / 46-60 (4) / 61 – 78 (29) >78 (50) missing (28)] + O <sub>2</sub> Saturation [<88 (59) / 88–92 (36) / 93-96 (21) / ≥97 (-2) / missing (30)] + Creatinine [<0.77 (14) / 0.77-1.08 (21) / >1.71 (48) / missing (29)] + Lymphocytes [<500 (55) / 500-799 (37) / 800-100 (22) / missing (19)] + Hemoglobin [<11.2 (51) / 11.2-12.2 (36) / >12.2 (25) / missing (20)] + smoking [No (25) / Yes (43) / missing (22)] + CRP [<9.7 (8) / 9.7-65.9 (20) / 66-188.5 (35) / >188.5 (45) / missing (18)] + Platelets [<124 (48) / >124 (27) / missing (18)] + Sodium [<144 (28) / >144 ( 53) / missing (17)]<br><a href="http://www.pandemyc-score.co/m">www.pandemyc-score.co / m</a> |                                                                                                                                         |                                       |                   |                    |                    |                                     |                                     |
| Turcotte JJ<br>et al. 2020 <sup>40</sup>        | USA     | 1<br>Mar<br>– 12<br>Apr   | <b>117</b>                          | logistic<br>regression and<br>Cox regression                                                                                                                                                                                                                                                                                                                                                                                                                                                                                                                                                                                                                                                             | Temperature at admission; supplemental O2 at<br>admission; sputum production; insulin<br>dependent diabetes and chronic kidney disease. | 0.88<br>(0.812 – 0.956)               | 26.3*             | 83.7*              | 79.4*              | NA                                  | NA                                  |
|                                                 |         |                           |                                     | Total Score: 22.316 – 0.242 temp + 0.189 O2L + 1.907 sputum + 2.471 IDDM + 1.567 CKD                                                                                                                                                                                                                                                                                                                                                                                                                                                                                                                                                                                                                     |                                                                                                                                         |                                       |                   |                    |                    |                                     |                                     |
| Vaid A et<br>al. 2020 <sup>38</sup>             | USA     | 15<br>Mar<br>– 22<br>May  | <b>4098</b><br>(D: 1514<br>V: 2584) | XGBoost                                                                                                                                                                                                                                                                                                                                                                                                                                                                                                                                                                                                                                                                                                  | Age; anion gap; CRP; LDH; oxygen saturation;                                                                                            | 0.853<br>(0.85 – 0.856)               |                   | 50                 | 94.4               | NA                                  | NA                                  |
|                                                 |         |                           |                                     | Log<br>Regression                                                                                                                                                                                                                                                                                                                                                                                                                                                                                                                                                                                                                                                                                        | BUN; ferritin; RDW; diastolic blood pressure<br>and lactate<br>(mortality at 7 days)                                                    | 0.821<br>(0.818 – 0.824)              | NA                | 46.3               | 92                 | NA                                  | NA                                  |
|                                                 |         |                           |                                     | LASSO                                                                                                                                                                                                                                                                                                                                                                                                                                                                                                                                                                                                                                                                                                    |                                                                                                                                         | 0.821<br>(0.818 – 0.823)              |                   | 46.2               | 92                 | NA                                  | NA                                  |
| Varol Y et<br>al. 2020 <sup>39</sup>            | Turkey  | 11<br>Mar<br>- 15<br>May  | <b>383</b>                          | Logistic<br>regression                                                                                                                                                                                                                                                                                                                                                                                                                                                                                                                                                                                                                                                                                   | Charlson comorbidity index; lymphocyte ratio;<br>age and dyspnoea                                                                       | 0.802<br>(0.777 - 0.886)              | 2.5<br>poi<br>nts | 82                 | 73                 | NA                                  | NA                                  |
|                                                 |         |                           |                                     | Total Score: Lymphocytes % [≥17.6 (0) / <17.6 (1)] + Age [<50 (0) / 50-65 (1) / ≥65 (2)] + CCI score [<3 (0) / ≥3 (1)] + Dyspnoea [Without (0) / With (1)]                                                                                                                                                                                                                                                                                                                                                                                                                                                                                                                                               |                                                                                                                                         |                                       |                   |                    |                    |                                     |                                     |
| Wang B et<br>al. 2020 <sup>40</sup>             | China   | Befo<br>re 20<br>Mar      | <b>104</b>                          | Logistic<br>regression                                                                                                                                                                                                                                                                                                                                                                                                                                                                                                                                                                                                                                                                                   | Age; chest tightness (oppression); AST and BUN                                                                                          | 0.893<br>(0.807 - 0.980)              | NA                | 96                 | 74.1               | NA                                  | NA                                  |

| Author,<br>Year <sup>reference</sup> | Country | Study<br>period<br>(2020)                    | N                         | Methods used<br>to derivate<br>nomograms                    | Predictors in final model                                                                                                                                              | AUROC (95%<br>confidence<br>interval)                                                                                                    | Cut-off<br>value | Sensitivity<br>(%) | Specificity<br>(%) | Positive<br>predictive<br>value (%) | Negative<br>predictive<br>value (%) |
|--------------------------------------|---------|----------------------------------------------|---------------------------|-------------------------------------------------------------|------------------------------------------------------------------------------------------------------------------------------------------------------------------------|------------------------------------------------------------------------------------------------------------------------------------------|------------------|--------------------|--------------------|-------------------------------------|-------------------------------------|
| Wang H et<br>al. 2021 <sup>77</sup>  | China   | 1 Mar –<br>16 Apr                            | 4711<br>D: 75%<br>V:25%   | Multivariate<br>models                                      | Age; SpO2; MAP and Temperature                                                                                                                                         | D: 0.798<br>(0.779 – 0.816)<br>V: 0.783<br>(0.751 – 0.815)                                                                               | NA               | 80.4               | 65.6               | NA                                  | NA                                  |
|                                      |         |                                              |                           |                                                             |                                                                                                                                                                        | 80                                                                                                                                       |                  | 61.6               | NA                 | NA                                  |                                     |
|                                      |         |                                              |                           |                                                             |                                                                                                                                                                        | Total Score: 0.742 + (0.006 x Age) + (-0.007 x SpO2) + (0.012 x Temperature) + (-0.008 x MAP)<br>https://wanghai.shinyapps.io/dynnomapp/ |                  |                    |                    |                                     |                                     |
| Wang J et<br>al. 2020 <sup>14</sup>  | China   | 28 Jan - 4<br>Mar                            | 278<br>(D: 234<br>V: 44)  | Multivariate<br>logistic<br>regression                      | Age; ferritin and D-dimer                                                                                                                                              | 0.871                                                                                                                                    | ≥85              | 86.4               | 81.8               | 39.6                                | 91.7                                |
|                                      |         |                                              |                           |                                                             |                                                                                                                                                                        |                                                                                                                                          |                  |                    |                    |                                     |                                     |
| Wang K et<br>al. 2020 <sup>78</sup>  | China   | D: 7 Jan<br>– 11 Feb<br>V: 1 Feb<br>– 20 Feb | 340<br>D: 296<br>V: 44    | Multivariate<br>logistic<br>regression and<br>XGBoost / AIC | Clinical model: Age; Hypertension and<br>Coronary heart disease<br>Laboratory model: Age; SpO2; Neutrophils<br>count; Lymphocyte count; hsCRP; D-dimer;<br>AST and GFR | 0.88<br>(0.80 – 0.95)<br><br>0.83<br>(0.68 – 0.93)                                                                                       | NA               | 92.3               | 77.4               | 21.4                                | 99.3                                |
|                                      |         |                                              |                           |                                                             |                                                                                                                                                                        |                                                                                                                                          |                  | 64.3               | 93.3               | 81.8                                | 84.8                                |
| Wang R et<br>al. 2020 <sup>41</sup>  | China   | Jan - Feb                                    | 450                       | Multivariate<br>logistic<br>regression                      | WBC; prognostic nutritional index [serum<br>albumin (g/L) + 5 ×lymphocyte count (10 <sup>9</sup> /L)]<br>and LDH                                                       | 0.950<br>(0.922 - 0.978)                                                                                                                 | NA               | 84.1               | 92.2               | NA                                  | NA                                  |
| Weng Z et<br>al. 2020 <sup>11</sup>  | China   | 1 Jan –<br>15 Feb                            | 301<br>(D: 176<br>V: 125) | LASSO                                                       | Age; NLR and CRP                                                                                                                                                       | 0.921<br>(0.835 – 0.968)                                                                                                                 | < 59<br>> 101    | 95.2<br>52.4       | 70.3<br>96.8       | 30.3<br>69.8                        | 99.1<br>93.8                        |
|                                      |         |                                              |                           |                                                             |                                                                                                                                                                        | Total Score: (1.14 × age – 20) + (1.63 × NLR) + (5.00 × D – dimer) + (0.14 × CRP)                                                        |                  |                    |                    |                                     |                                     |
| Wu G et al.<br>202 <sup>13</sup>     | China   | 16 Feb –<br>20 Mar                           | 110                       | LASSO                                                       | Urea; WBC; prothrombin activity; IL-2R;<br>indirect bilirubin; myoglobin and fibrinogen<br>degradation products                                                        | 0.997<br>(0.99 - 1.00)                                                                                                                   | NA               | 98                 | 91                 | NA                                  | NA                                  |
| Xiao F et al.<br>2021 <sup>79</sup>  | China   | Jan – Feb                                    | 74                        | Cox regression<br>and LASSO                                 | Age; Malignancy; Highest temperature;<br>Radiomics lesion and Radiomics lung                                                                                           | C- Statistic<br>0.899<br>(0.850 – 0.950)                                                                                                 | NA               | NA                 | NA                 | NA                                  | NA                                  |
| Xiao LS et<br>al. 2020 <sup>42</sup> | China   | 1 Jan –<br>18 Mar                            | 442<br>(D: 231<br>V: 211) | Multivariate<br>logistic<br>regression                      | Hypertension; Neutrophils; CRP;<br>lymphocytes and LDH                                                                                                                 | 0.861<br>(0.800 – 0.922)                                                                                                                 | ≥=-1.508         | 85                 | 76                 | NA                                  | NA                                  |
|                                      |         |                                              |                           |                                                             |                                                                                                                                                                        |                                                                                                                                          |                  |                    |                    |                                     |                                     |

| Author, Year <sup>reference</sup>                                                                                                                                   | Country | Study period (2020) | N                                                   | Methods used to derivate nomograms    | Predictors in final model                                                                                                                                                                                                | AUROC (95% confidence interval)       | Cut-off value | Sensitivity (%) | Specificity (%) | Positive predictive value (%) | Negative predictive value (%) |
|---------------------------------------------------------------------------------------------------------------------------------------------------------------------|---------|---------------------|-----------------------------------------------------|---------------------------------------|--------------------------------------------------------------------------------------------------------------------------------------------------------------------------------------------------------------------------|---------------------------------------|---------------|-----------------|-----------------|-------------------------------|-------------------------------|
| Yadaw AS et al. 2020 <sup>43</sup>                                                                                                                                  | USA     | 9 Mar - 6 Apr       | <b>3841</b><br>( <b>D</b> : 2880<br><b>V</b> : 961) | Logistic regression; RF; SVM; XGBoost | Age; sex; ethnicity; encounter type; temperature; systolic blood pressure; diastolic blood pressure; oxygen saturation; lowest oxygen saturation; smoking; asthma; COPD; hypertension; obesity; diabetes; HIV and cancer | 0.91<br>(0.88 - 0.94)                 | NA            | NA              | NA              | NA                            | NA                            |
| Yan L et al. 2020 <sup>44</sup>                                                                                                                                     | China   | 10 Jan - 18 Feb     | <b>485</b><br>( <b>D</b> : 375<br><b>V</b> : 110)   | XGBoost                               | LDH; lymphocytes and CRP                                                                                                                                                                                                 | 0.978                                 | NA            | NA              | NA              | NA                            | NA                            |
| Yu J et al. 2021 <sup>80</sup>                                                                                                                                      | China   | 24 Jan – 26 Apr     | <b>314</b>                                          | Cox regression                        | Age; admission classification; WBC; Neu%, Ferritin; CEA; and D-Dimer                                                                                                                                                     | C-Statistic<br>0.84<br>(0.79 – 0.88)  | NA            | NA              | NA              | NA                            | NA                            |
| Zhang B et al. 2020 <sup>40</sup>                                                                                                                                   | China   | 3 Jan – 20 Mar      | <b>233</b>                                          | LASSO                                 | Age; LDH; AST; prothrombin time; serum creatinine; sodium; fasting blood glucose and D-dimer                                                                                                                             | 0.943<br>(0.927 – 0.957)              | 0.190         | 96.8%           | 82.4%           | 58%                           | 99%                           |
| Zhang S et al. 2020 <sup>45</sup>                                                                                                                                   | China   | 12 Jan - 9 Feb      | <b>828</b>                                          | Cox regression                        | Age; LDH; NLR and direct bilirubin                                                                                                                                                                                       | C-Statistic<br>0.886<br>(0.873–0.899) | NA            | NA              | NA              | NA                            | NA                            |
| Total Score: [(Age-20) x1.25] + [NLR>8 (26.6) / NLR≤8 (0)] + [Direct bilirubin>5 (16.06) / Direct bilirubin≤5 (0)] + [LDH>360 (67.63) / LDH≤360 (0)]                |         |                     |                                                     |                                       |                                                                                                                                                                                                                          |                                       |               |                 |                 |                               |                               |
| Zhao Z et al. 2020 <sup>46</sup>                                                                                                                                    | USA     | 9 Mar – 20 Apr      | <b>641</b><br>( <b>D</b> : 454<br><b>V</b> : 187)   | Logistic regression                   | Age; heart failure; procalcitonin; LDH; COPD; SpO <sub>2</sub> and heart rate                                                                                                                                            | 0.87<br>(0.83-0.92)                   | NA            | 7.1%            | 100%            | NA                            | NA                            |
| Total Score: Heart Failure (1) + Procalcitonin >0.34 ng/mL (1) + LDH>460 U/L (1) + COPD (1) + SpO <sub>2</sub> <92% (1) + Heart rate>117 bpm (1) + Age>63 years (1) |         |                     |                                                     |                                       |                                                                                                                                                                                                                          |                                       |               |                 |                 |                               |                               |
| Zhou J et al. 2020 <sup>2</sup>                                                                                                                                     | China   | 12 Jan - 26 Feb     | <b>118</b>                                          | Multivariate logistic regression      | LDH; BUN; D-dimer; albumin and NLR                                                                                                                                                                                       | 0.955                                 | 0.6005        | 88.9%           | 98.4%           | NA                            | NA                            |
| Zinellu A et al. 2020 <sup>47</sup>                                                                                                                                 | Italy   | 15 Mar - 15 May     | <b>115</b>                                          | Cox regression                        | AST and ALT                                                                                                                                                                                                              | 0.701<br>(0.603-0.787)                | <1.49         | 74%             | 70%             | NA                            | NA                            |
| Total score: AST / ALT                                                                                                                                              |         |                     |                                                     |                                       |                                                                                                                                                                                                                          |                                       |               |                 |                 |                               |                               |

**N:** Participants for model development (**D**) or internal validation (**V**) sets. **ACE-inhibitor:** Angiotensin converting enzyme inhibitor; **ALT:** Alanine aminotransferase; **ANN:** artificial neural network; **AR blocker:** Angiotensin II receptor blocker; **AST:** Aspartate aminotransferase; **BUN:** Blood urea nitrogen; **CEA:** Carcioembryonic antigen; **CKD:** Chronic kidney disease; **COPD:** Chronic obstructive pulmonary disease; **CRP:** C-reactive protein; **cTnI:** cardiac troponin I; **D-Bil:** Direct bilirubin; **DM:** Diabetes mellitus; **DPP-4 inhibitor:** Dipeptidyl peptidase 4 inhibitor; **GBDT:** gradient boosted decision tree; **GFR:** glomerular filtration rate; **IL-2R:** Interleukin 2 receptor; **IL-6:** Interleukin 6; **KNN:** k-nearest neighbours; **LASSO:** least absolute shrinkage and selection operator; **LDH:** Lactate dehydrogenase; **MAP:** mean arterial pressure; **NA:** Not available; **Neu%:** neutrophils percentage; **NLR:** Neutrophils to lymphocyte ratio; **NOD:** number of days of symptoms prior to hospital admission; **NSAID:** Nonsteroidal anti-inflammatory drugs; **P/F ratio:** arterial oxygen pressure (PaO<sub>2</sub>) / fractional inspired oxygen (FiO<sub>2</sub>); **PLS:** Partial least square; **RBF-SVM:** SVM with radial basis function kernel; **RDW:** Red cell distribution width; **RF:** random forest; **SLE:** Systematic lupus erythematosus; **SVM:** support vector machine; **WBC:** White blood cells. \*optimal cut-off for ICU admission or death.
