# Supplementary material for: Predicting In-Hospital Mortality in Severe COVID-19: A Systematic Review and External Validation of Clinical Prediction Rules
Source: MDPI journal article supplement (doi:10.3390/biomedicines10102414), 2022-09-27
Supplement: s1 [file s1]

**Supplementary Table S1.** Search strategies carried out in four bibliographic databases for documents that report on clinical prediction models for hospital mortality caused by COVID-19

| Database       | Search Strategy                                                                                                                                                                                                                    | Items   |
|----------------|------------------------------------------------------------------------------------------------------------------------------------------------------------------------------------------------------------------------------------|---------|
| PubMed         | ((Clinical Decision Rules OR nomograms)) AND (covid* OR sars*) AND mortality                                                                                                                                                       | 106     |
| Scopus         | #1: Clinical Decision Rules OR Nomograms                                                                                                                                                                                           | 85279   |
|                | #2: Mortality                                                                                                                                                                                                                      | 4022668 |
|                | #3: Covid* OR SARS*                                                                                                                                                                                                                | 711600  |
|                | #1 AND #2 AND 3: ("Clinical Decision Rules" OR Nomograms) AND (Mortality) AND (Covid* OR SARS*)                                                                                                                                    | 375     |
| Web Of Science | #1: Clinical Decision Rules OR Nomograms                                                                                                                                                                                           | 26299   |
|                | #2: Mortality                                                                                                                                                                                                                      | 1054626 |
|                | #3: Covid* OR SARS*                                                                                                                                                                                                                | 217115  |
|                | #1 AND #2 AND 3: ("Clinical Decision Rules" OR Nomograms) AND (Mortality) AND (Covid* OR SARS*)                                                                                                                                    | 79      |
| EMBASE         | ('clinical decision rules'/exp OR 'clinical decision rules' OR (('clinical'/exp OR clinical) AND ('decision'/exp OR decision) AND rules) OR 'nomograms'/exp OR nomograms) AND (covid* OR sars*) AND ('mortality'/exp OR mortality) | 53      |
