# Supplementary material for: Predicting In-Hospital Mortality in Severe COVID-19: A Systematic Review and External Validation of Clinical Prediction Rules
Source: MDPI journal article supplement (doi:10.3390/biomedicines10102414), 2022-09-27
Supplement: s1 [file s1]

|                                                 |                            |   |   |   |   |   |   |   |   |   |
|-------------------------------------------------|----------------------------|---|---|---|---|---|---|---|---|---|
| Zhao Z. PLoS One. 2020 <sup>46</sup>            | Development and validation | ? | ? | ? | + | ? | ? | ? | ? | ? |
| Zhou J. Current Med Res Opin 2020 <sup>2</sup>  | Development                | + | + | + | + | + | + | + | + | + |
| Zinellu A. Eur J Clin Invest 2020 <sup>47</sup> | Development                | + | - | + | - | - | + | + | - | + |

PROBAST = Prediction model Risk Of Bias ASsessment Tool; ROB = risk of bias.

\* + indicates low ROB/low concern regarding applicability; - indicates high ROB/high concern regarding applicability; and ? indicates unclear ROB/unclear concern regarding applicability.
